1 **Adaptation of the autosomal part of the genome on the presence of dioecy**

2

3 Jitka Žlůvová\*, Roman Hobza, Bohuslav Janoušek\*

4 Department of Plant Developmental Genetics, Institute of Biophysics, Academy of Sciences  
5 of the Czech Republic, Královopolská 135, Brno, Czech Republic.

6 \* corresponding authors

7 **Email:** jitka@ibp.cz, janousek@ibp.cz

8 **Author Contributions:** J.Z. and B.J. designed research; R.H. contributed new analysis tools;  
9 J.Z. and B.J. analyzed data; R.H. discussed the paper; and J.Z. and B.J. wrote the paper.

10 **Competing Interest Statement:** The authors declare no competing interest.

11 **Keywords:** genome evolution, adaptive evolution, dioecy

12 **This file includes:**

13 Main Text

14 Figure 1

15 Table 1

16 **Abstract**

17 We have attempted to answer the question of whether the presence of sex chromosomes in  
18 the genome can affect the evolution of the autosomal part of the genome. As a model, we  
19 used dioecious plants from the section *Otites* of the genus *Silene*. We have observed a rise in  
20 adaptive evolution in the autosomal and pseudoautosomal parts of the genome, which are  
21 associated with the evolution of dioecy. This rise is caused neither by the accumulation of  
22 sexually antagonistic genes in the pseudoautosomal region nor by the co-evolution of genes  
23 acting in mitochondria (in spite of the fact that the dioecy evolved in this case most likely  
24 from cytoplasmic male sterility). Thus, this rise in the amount of positively selected codons is  
25 most likely caused by the adaptive evolution of genes involved in the specialization of the  
26 autosomal part of the genome on the dioecy as described in sex-allocation theory.

## 27 **Introduction**

28

29 Separate sexes are very common in animals, but they also appear in plants (Renner & Müller,  
30 2021). After sex determining gene(s) appear in the genome, many evolutionary processes are  
31 started on the sex chromosomes (Charlesworth, 2019). Moreover, many autosomal genes  
32 express in a sex-specific manner, and their expression is regulated by the presence of sex-  
33 determining gene(s). These sex-specific differences in gene expression lead to the formation  
34 of male and female individuals. But can the presence of separate sexes lead to evolutionary  
35 changes in the sequences of autosomal genes? Because males invest more in the quantity of  
36 their progeny, whereas the goal of the females is to invest in the quality of the progeny, the  
37 presence of separate sexes could lead to the adaptation of the autosomal genes to males' and  
38 females' different breeding strategies.

39 In animals, separate sexes and sex chromosomes are of very old origin, and thus it could be  
40 very difficult to search for signs of the adaptation of the autosomal part of the genome to the  
41 presence of separate sexes. On the other hand, many plant genera contain recently evolved  
42 dioecious clades. One of the plant genera with young sex chromosomes is the genus *Silene*.  
43 The dioecious *Silene* species are especially well-suited to this study because closely related  
44 non-dioecious species are known, transcriptomic data for both the dioecious species and their  
45 non-dioecious relatives are known, and genetic maps are available in several species  
46 (reviewed in (Balounova et al., 2019) ). In the genus *Silene*, apart from the dosage  
47 compensation studies (Martin et al., 2019; Muyle et al., 2018), adaptation of the  
48 transcriptome to the dioecy was also studied from a quantitative point of view (Zemp,  
49 Widmer, & Charlesworth, 2018). However, it is not known whether the presence of sex  
50 chromosomes in the genome can affect the evolution of the coding regions in the autosomal  
51 part of the genome.

52

## 53 **Results and discussion**

54 In this study, we use the currently available RNAseq data obtained in the dioecious section  
55 *Otites* to study the influence of the rise of dioecy on the evolution of the sequences that are  
56 not sex-linked. Results of the phylogenetic analysis shown in Fig. 1 are mostly in accordance  
57 with the results from the previous study that did not include *S. nocturna* and *S. paradoxa*. A  
58 minor difference in topology is that the current results support the clade joining two members

59 of the group Cyri (defined previously (Balounova et al., 2019) according to phenotypic  
60 markers), while in our previous study, the group Cyri appeared as completely polyphyletic  
61 (Balounova et al., 2019). Current dating, based on the estimation of the synonymous  
62 divergence of the outgroup (*S. nocturna*) from the other species, suggests the age of dioecious  
63 section *Otites* cca 2.3 million years which is in the range of the previous estimate based on  
64 calibration by fossils (1.17–2.60 million years) (Slancarova et al., 2013).

65 The  $\omega$  ratio ( $\omega = dN/dS$ ) is one of the most widely used statistical tests used to quantify  
66 selection pressures acting on protein-coding regions. This measure quantifies selection  
67 pressures by comparing the rate of substitutions at silent sites (dS), which are presumed  
68 neutral, to the rate of substitutions at non-silent sites (dN), which possibly experience  
69 selection. The comparison of the two- and three-ratios branch models in the CODEML  
70 program of PAML package (Yang, 2007) shows that the  $\omega$  value of the branch preceding sex  
71 chromosome evolution ( $\omega = 0.16$ ; blue in Fig. 1) is lower than the  $\omega$  value of the branch  
72 where dioecy and sex chromosomes evolved ( $\omega = 0.29$ ; red in Fig. 1). This difference is  
73 highly significant ( $P < 10^{-99}$ , likelihood ratio test; LRT). After the formation of the dioecy  
74 (green in Fig. 1), the  $\omega$  value significantly decreased ( $\omega = 0.26$ ;  $P < 10^{-99}$ , LRT).

75 Because the increase of the  $\omega$  values can be caused by the changes in the number of either  
76 positively or neutrally selected sites, we compared branch-site models of these branches. The  
77 results are summarized in Table 1. The branch where dioecy evolved showed a significant  
78 percentage of positively selected codons ( $P < 10^{-99}$ , LRT). On the other hand, we did not  
79 detect codons under positive selection in the branch preceding dioecy (blue in Fig. 1) ( $P >$   
80  $0.99$ , LRT). Moreover, the  $\omega$  values of sites under purifying selection did not increase  
81 significantly ( $P = 0.95$ , Wilcoxon test). To confirm these results, we performed tests for  
82 relaxed selection using RELAX program (Wertheim, Murrell, Smith, Kosakovsky Pond, &  
83 Scheffler, 2015) of HyPhy package (Kosakovsky Pond et al., 2020; Pond, Frost, & Muse,  
84 2005). Transition from the gynodioecy to the dioecy was connected with the selection  
85 intensification ( $P = 0.00$ ;  $K = 1.55$ ). On the other hand, when the branch involving dioecy  
86 evolution and the branch after sex chromosome evolution were compared, non-significant  
87 relaxation was detected ( $P = 0.339$ ,  $K = 0.91$ ). Most of the identified adaptively evolved  
88 codons (63 out of 87 codons) are recruited from the neutrally evolved codons, which is  
89 significantly more than by chance ( $P < 10^{-16}$ , chi-squared goodness of fit test). Because the  
90 dioecy in the *Silene* section *Otites* most likely evolved from the gynodioecy, and because the  
91 gynodioecy is in the genus *Silene* usually of nucleo-cytoplasmic type, the dioecy evolved, in

92 this case, most likely by the genetic fixation of a male sterile cytoplasm and subsequent  
93 recruitment of a fertility restorer as sex determining gene, as discussed by (Zluvova et al.,  
94 2005). In this case, no drastic change in population size or rate of inbreeding is necessary to  
95 open the route to dioecy. The observed absence of any sign of selective pressure relaxation is  
96 in accordance with this hypothesis.

97 The rise of the amount of positively selected codons on the branch including sex chromosome  
98 evolution cannot be caused by the selection of sexually antagonistic genes on the sex  
99 chromosomes (Rice, 1996), because the analysed dataset does not contain any completely  
100 sex-linked gene. Moreover, it cannot be caused by the accumulation of sexually antagonistic  
101 genes in the pseudoautosomal region, because we found that only one of the studied ESTs  
102 was located in this part of the sex chromosomes.

103 Because all close relatives of the analyzed species are gynodioecious, most likely with  
104 cytoplasmic male sterility, one plausible explanation for the rise of adaptive evolution can be  
105 connected with the presumed nucleo-cytoplasmic origin of the sex-determining system. The  
106 fixation of a certain type of male-sterility causing cytoplasm could influence the evolution of  
107 nuclear genes involved in mitochondrial metabolism. However, among the 42 ESTs  
108 identified as having at least one adaptively evolved codon on the branch involving sex  
109 chromosome formation, we did not find an overrepresentation of proteins located in  
110 mitochondria (7 ESTs;  $P = 0.77$ , Pearson's chi-squared test).

111 We can hypothesize that this rise in the amount of positively selected codons is caused by the  
112 selection of genes involved in the specialization of the genome on the dioecy as described in  
113 the sex-allocation theory (Charnov, 1982), which states that female plants allocate more  
114 resources to the quality of seeds whereas male plants allocate resources into the amount of  
115 pollen. However, based on phenotypic data, it is possible to conclude that the adaptation of  
116 the genome to the dioecy is rather complex and includes a wide variety of genes (Geber,  
117 Dawson, & Delph, 1999). Indeed, the genes identified as adaptively evolving on the branch  
118 where dioecy evolved (see Supporting Information) show rather diverse characteristics.  
119 These results are in good accordance with the previous observations on the phenotypic level  
120 (Geber et al., 1999).

121 The discovered coincidence between the increased amount of adaptively evolved codons in  
122 autosomes and the evolution of dioecy cannot prove causality in this process. However, the

123 hypothesis that the changes in autosomes represent an adaptation to the sexually dimorphic  
124 phenotype of dioecious species appears most likely.

125

## 126 **Materials and methods**

127 The dataset from the previous work (Balounova et al., 2019) was supplemented by *S.*  
128 *nocturna* (SRR6040876) and *S. paradoxa* (SRR999296-SRR999299, publically available)  
129 samples. *S. pseudotites* has been excluded from the dataset based on its suspected hybrid  
130 origin. The reads of the *S. nocturna* and *S. paradoxa* were assembled using Trinity (Haas et  
131 al., 2013). The assembly was treated with an Evidencemapper pipeline to reduce the level of  
132 duplicates and used as a reference. The reads were mapped using Bowtie2 (Langmead &  
133 Salzberg, 2012), the SNPs were called via FreeBayes (Garrison & Marth, 2012) and phasing  
134 was performed with WhatsHap (Patterson et al., 2015). The regions with coverage lower than  
135 2 masked using the maskfasta method in BEDTools (Quinlan & Hall, 2010). The phased  
136 sequences were added to the original alignments using the MAFFT aligner (Katoh &  
137 Standley, 2013) based on the results of best reciprocal blast hit search (Camacho et al., 2009).  
138 Phylogenetic analysis was done using the StarBeast2 module in BEAST 2 (Bouckaert et al.,  
139 2014; Ogilvie, Bouckaert, & Drummond, 2017). Two independent chains were run for 1000  
140 000 000 states (Yule model, birth-death). For the dating, the calibration of the most recent  
141 common ancestor of *S. nocturna* and the other species was done similarly to Balounova et al.  
142 (Balounova et al., 2019) (based on estimated divergence per synonymous site dS  
143 (substitutions per synonymous site) and the divergence time estimates for several angiosperm  
144 lineages (Brassicaceae, Malvaceae, Euphorbiaceae, Fabaceae, Cucurbitaceae, Rosaceae,  
145 Solanaceae, and Poaceae), so as not to depend on a single fossil record or phylogenetic tree  
146 position, which yielded a mean substitution rate of  $5.35 \times 10^{-9}$  synonymous substitutions/site/  
147 year) (De La Torre, Li, Van de Peer, & Ingvarsson, 2017). Ks values for the distance of  
148 individual species of the section *Otites* to *S. nocturna* were estimated using KaKs calculator 2  
149 program (Wang, Zhang, Zhang, Zhu, & Yu, 2010), and the mean value was used for the  
150 calibration of the tree. The resulting dataset did not contain any of the completely sex-linked  
151 genes identified previously (Balounova et al., 2019) (Martin et al., 2019).

152 PAML analyses were used to determine whether some ESTs evolved under selective  
153 pressure. The CODEML program of PAML (Yang, 2007) was used to estimate the ratio ( $\omega$ )  
154 of the non-synonymous substitution rate (dN) to the synonymous substitution rate (dS). As

155 the reference tree, the phylogenetic tree constructed as described above was used. The  
156 equilibrium frequencies of codons were calculated from the nucleotide frequencies  
157 (CodonFreq=2) because it best fits the data as calculated by second-order AIC. All models in  
158 CODEML were run at five different initial  $\omega$  values ( $\omega = 0.1, 0.2, 0.5, 1, 2$ ), and no problems  
159 with the convergence were observed. Both branch and branch-site models were applied to the  
160 branch preceding sex chromosome formation, to the branch including sex chromosome  
161 formation and to the branch following the sex chromosome formation. In the branch analyses,  
162 two-ratios models were compared to three-ratios models to reveal whether the  $\omega$  values differ  
163 significantly. The resulting log likelihood values were evaluated using likelihood-ratio tests  
164 to determine any statistical significance of the difference. The chi2 program of PAML was  
165 used to estimate the P-values. The confidence intervals for proportion were computed online  
166 (<http://vassarstats.net/prop1.html>) using the method with continuity correction (Newcombe,  
167 1998) that is derived from a procedure outlined in (Wilson, 1927). The results obtained in  
168 CODEML were further confirmed using a test for relaxed selection in RELAX program  
169 (Wertheim et al., 2015) of the HypHy package (Pond et al., 2005) (Kosakovsky Pond et al.,  
170 2020). Because the results did not converge well, the analysis was run 500-times and the  
171 results with the highest log likelihood were used.

172 The modified model A of the branch-site models was used to compute the percentages  
173 of purifying, neutral and adaptive codons in the analyzed ESTs, to compute the  $\omega$  values, to  
174 compute the Bayes Empirical Bayes probability of codons being either purifying, neutral or  
175 adaptive and to identify ESTs with adaptively evolved codons. The Wilcoxon test computed  
176 online (<https://www.socscistatistics.com/tests/signedranks/default2.aspx>) was used to  
177 compare the  $\omega$  values of the codons with  $\omega < 1$  between the branches before and during sex  
178 chromosome and dioecy formation. The chi-squared goodness of fit test was used to calculate  
179 the P-value of adaptively evolving codons to evolve from neutrally evolving codons. The  
180 Pearson's chi-squared test was used to compute the P-value of a random presence of genes  
181 acting in mitochondria among the genes with positively selected codons.

182

### 183 **Acknowledgments**

184 This research was supported by the Czech Science Foundation (grant 19-15609S).  
185 Computational resources were supplied by the project "e-Infrastruktura CZ" (e-INFRA  
186 LM2018140) provided within the program Projects of Large Research, Development and

187 Innovations Infrastructures and by the ELIXIR-CZ project (LM2018131), part of the  
188 international ELIXIR infrastructure.

189

190 **Competing Interest Statement**

191 No financial and/or non-financial competing interests declared.



192 **Figures**  
193

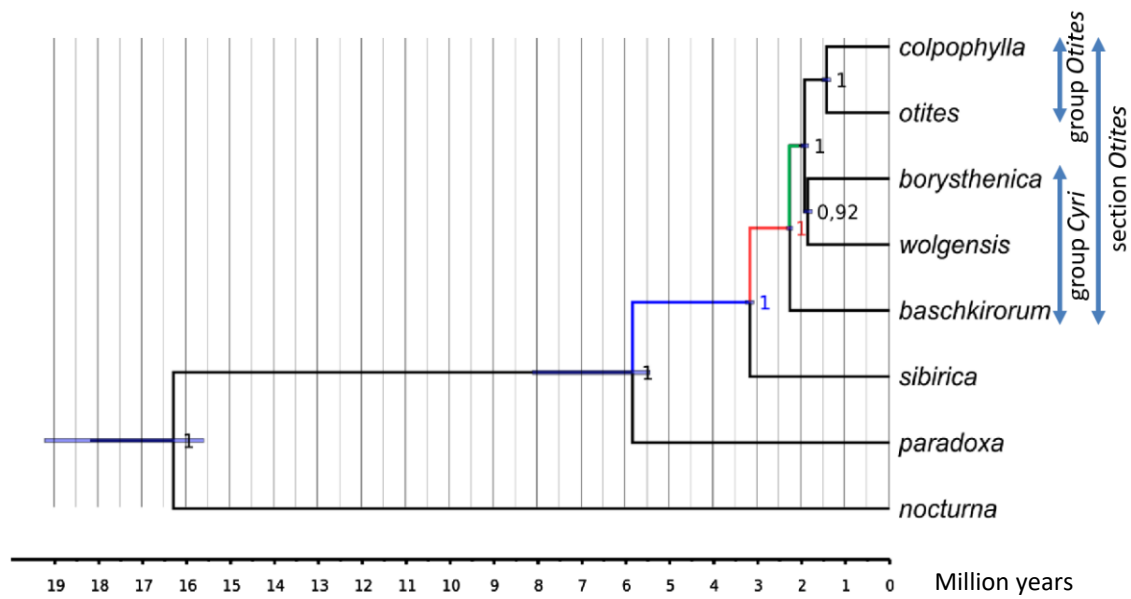

194  
195  
196

197 **Figure 1. Phylogenetic tree of the section *Otites* and the closely related species.** The  
198 colors of the highlighted branches refer to analyses of adaptive analyses. For details, see  
199 Results and Discussion.

200 **Tables**  
201

| branch                             | $\omega < 1$   |                                     | $\omega = 1$   |                                     | $\omega > 1$   |                                     |
|------------------------------------|----------------|-------------------------------------|----------------|-------------------------------------|----------------|-------------------------------------|
|                                    | percentage (%) | 95% CI of percentage difference (%) | percentage (%) | 95% CI of percentage difference (%) | percentage (%) | 95% CI of percentage difference (%) |
| preceding sex chromosome evolution | 80.496         | -0.19 - 0.31                        | 19.504         | -0.17 - 0.34                        | <b>0</b>       | <b>0.02 - 0.03</b>                  |
| including sex chromosome evolution | 80.557         | -0.2 - 0.31                         | 19.419         | -0.17 - 0.32                        | <b>0.024</b>   | <b>0.02 - 0.03</b>                  |
| following sex chromosome evolution | 80.497         |                                     | 19.503         |                                     | <b>0</b>       |                                     |

202

203 **Table 1. Branch-site analysis of *Silene* transcriptome before and after sex chromosome**  
204 **evolution.** Confidence intervals (CI) are given for the difference of percentage between the  
205 neighboring rows. Statistically significant values are highlighted in bold.

206 **Bibliography**

- 207 Balounova, V., Gogela, R., Cegan, R., Cangren, P., Zluvova, J., Safar, J., ... Janousek, B.  
208 (2019). Evolution of sex determination and heterogamety changes in section Otites of the  
209 genus *Silene*. *Scientific Reports*, 9(1), 1045. doi: 10.1038/s41598-018-37412-x
- 210 Bouckaert, R., Heled, J., Kühnert, D., Vaughan, T., Wu, C.-H., Xie, D., ... Drummond, A. J.  
211 (2014). BEAST 2: a software platform for Bayesian evolutionary analysis. *PLoS*  
212 *Computational Biology*, 10(4), e1003537. doi: 10.1371/journal.pcbi.1003537
- 213 Camacho, C., Coulouris, G., Avagyan, V., Ma, N., Papadopoulos, J., Bealer, K., & Madden,  
214 T. L. (2009). BLAST+: architecture and applications. *BMC Bioinformatics*, 10, 421. doi:  
215 10.1186/1471-2105-10-421
- 216 Charlesworth, D. (2019). Young sex chromosomes in plants and animals. *The New*  
217 *Phytologist*, 224(3), 1095–1107. doi: 10.1111/nph.16002
- 218 Charnov, E. L. (1982). The theory of sex allocation. *Monographs in Population Biology*, 18,  
219 1–355.
- 220 De La Torre, A. R., Li, Z., Van de Peer, Y., & Ingvarsson, P. K. (2017). Contrasting Rates of  
221 Molecular Evolution and Patterns of Selection among Gymnosperms and Flowering  
222 Plants. *Molecular Biology and Evolution*, 34(6), 1363–1377. doi:  
223 10.1093/molbev/msx069
- 224 Garrison, E., & Marth, G. (2012). *Haplotype-based variant detection from short-read*  
225 *sequencing*.
- 226 Geber, M. A., Dawson, T. E., & Delph, L. F. (Eds.). (1999). *Gender and sexual dimorphism*  
227 *in flowering plants*. Berlin, Heidelberg: Springer Berlin Heidelberg. doi: 10.1007/978-3-  
228 662-03908-3
- 229 Haas, B. J., Papanicolaou, A., Yassour, M., Grabherr, M., Blood, P. D., Bowden, J., ...  
230 Regev, A. (2013). De novo transcript sequence reconstruction from RNA-seq using the

- 231 Trinity platform for reference generation and analysis. *Nature Protocols*, 8(8), 1494–  
232 1512. doi: 10.1038/nprot.2013.084
- 233 Katoh, K., & Standley, D. M. (2013). MAFFT multiple sequence alignment software version  
234 7: improvements in performance and usability. *Molecular Biology and Evolution*, 30(4),  
235 772–780. doi: 10.1093/molbev/mst010
- 236 Kosakovsky Pond, S. L., Poon, A. F. Y., Velazquez, R., Weaver, S., Hepler, N. L., Murrell,  
237 B., ... Muse, S. V. (2020). HyPhy 2.5-A Customizable Platform for Evolutionary  
238 Hypothesis Testing Using Phylogenies. *Molecular Biology and Evolution*, 37(1), 295–  
239 299. doi: 10.1093/molbev/msz197
- 240 Langmead, B., & Salzberg, S. L. (2012). Fast gapped-read alignment with Bowtie 2. *Nature*  
241 *Methods*, 9(4), 357–359. doi: 10.1038/nmeth.1923
- 242 Martin, H., Carpentier, F., Gallina, S., Godé, C., Schmitt, E., Muyle, A., ... Touzet, P. (2019).  
243 Evolution of Young Sex Chromosomes in Two Dioecious Sister Plant Species with  
244 Distinct Sex Determination Systems. *Genome Biology and Evolution*, 11(2), 350–361.  
245 doi: 10.1093/gbe/evz001
- 246 Muyle, A., Zemp, N., Fruchard, C., Cegan, R., Vrana, J., Deschamps, C., ... Marais, G. A. B.  
247 (2018). Genomic imprinting mediates dosage compensation in a young plant XY system.  
248 *Nature Plants*, 4(9), 677–680. doi: 10.1038/s41477-018-0221-y
- 249 Newcombe, R. G. (1998). Two-sided confidence intervals for the single proportion:  
250 comparison of seven methods. *Statistics in Medicine*, 17(8), 857–872. doi:  
251 10.1002/(sici)1097-0258(19980430)17:8<857::aid-sim777>3.0.co;2-e
- 252 Ogilvie, H. A., Bouckaert, R. R., & Drummond, A. J. (2017). Starbeast2 brings faster species  
253 tree inference and accurate estimates of substitution rates. *Molecular Biology and*  
254 *Evolution*, 34(8), 2101–2114. doi: 10.1093/molbev/msx126
- 255 Patterson, M., Marschall, T., Pisanti, N., van Iersel, L., Stougie, L., Klau, G. W., &

- 256 Schönhuth, A. (2015). WhatsHap: Weighted Haplotype Assembly for Future-Generation  
257 Sequencing Reads. *Journal of Computational Biology*, 22(6), 498–509. doi:  
258 10.1089/cmb.2014.0157
- 259 Pond, S. L. K., Frost, S. D. W., & Muse, S. V. (2005). HyPhy: hypothesis testing using  
260 phylogenies. *Bioinformatics*, 21(5), 676–679. doi: 10.1093/bioinformatics/bti079
- 261 Quinlan, A. R., & Hall, I. M. (2010). BEDTools: a flexible suite of utilities for comparing  
262 genomic features. *Bioinformatics*, 26(6), 841–842. doi: 10.1093/bioinformatics/btq033
- 263 Renner, S. S., & Müller, N. A. (2021). Plant sex chromosomes defy evolutionary models of  
264 expanding recombination suppression and genetic degeneration. *Nature Plants*, 7(4),  
265 392–402. doi: 10.1038/s41477-021-00884-3
- 266 Rice, W. R. (1996). Sexually antagonistic male adaptation triggered by experimental arrest of  
267 female evolution. *Nature*, 381(6579), 232–234. doi: 10.1038/381232a0
- 268 Slancarova, V., Zdanska, J., Janousek, B., Talianova, M., Zschach, C., Zluvova, J., ...  
269 Vyskot, B. (2013). Evolution of sex determination systems with heterogametic males and  
270 females in silene. *Evolution*, 67(12), 3669–3677. doi: 10.1111/evo.12223
- 271 Wang, D., Zhang, Y., Zhang, Z., Zhu, J., & Yu, J. (2010). KaKs\_Calculator 2.0: a toolkit  
272 incorporating gamma-series methods and sliding window strategies. *Genomics,*  
273 *Proteomics & Bioinformatics / Beijing Genomics Institute*, 8(1), 77–80. doi:  
274 10.1016/S1672-0229(10)60008-3
- 275 Wertheim, J. O., Murrell, B., Smith, M. D., Kosakovsky Pond, S. L., & Scheffler, K. (2015).  
276 RELAX: detecting relaxed selection in a phylogenetic framework. *Molecular Biology*  
277 *and Evolution*, 32(3), 820–832. doi: 10.1093/molbev/msu400
- 278 Wilson, E. B. (1927). Probable Inference, the Law of Succession, and Statistical Inference.  
279 *Journal of the American Statistical Association*, 22(158), 209–212. doi:  
280 10.1080/01621459.1927.10502953

- 281 Yang, Z. (2007). PAML 4: phylogenetic analysis by maximum likelihood. *Molecular Biology*  
282 *and Evolution*, 24(8), 1586–1591. doi: 10.1093/molbev/msm088
- 283 Zemp, N., Widmer, A., & Charlesworth, D. (2018). Has adaptation occurred in males and  
284 females since separate sexes evolved in the plant *Silene latifolia*? *Proceedings.*  
285 *Biological Sciences / the Royal Society*, 285(1883). doi: 10.1098/rspb.2017.2824
- 286 Zluvova, J., Lengerova, M., Markova, M., Hobza, R., Nicolas, M., Vyskot, B., ... Janousek,  
287 B. (2005). The inter-specific hybrid *Silene latifolia* x *S. viscosa* reveals early events of  
288 sex chromosome evolution. *Evolution & Development*, 7(4), 327–336. doi:  
289 10.1111/j.1525-142X.2005.05038.x
